# Supplementary material
Source: ML conference proceedings conference paper supplement (https://openreview.net/forum?id=WL55AVdvxq)
Supplement: supplementary_material [file appendix.pdf › appendix.pdf]

## Organisation of the Appendix.

1. In Appendix A, we prove Proposition 5 and theorems 1 and 2, show tightness of Theorem 1 for Gaussian priors and extend Appendix A in the case of priors supported on a low-dimensional affine subspace. We also prove the tightness of theorem 1 in the case of Gaussian priors.
2. In Appendix B, we provide several lemmas which enable to control  $\sigma \mapsto x_\sigma^*$ .

## A Proofs of Proposition 5 and theorems 1 and 2

### A.1 Preliminary results

We start by the following proposition establishing that  $p_\sigma$  is log-concave and  $\frac{1}{\sigma^2}$ -smooth.

**Proposition 4.** Fix  $\sigma > 0$ . Under Assumption 1,  $x \mapsto -\ln p_\sigma(x)$  is convex with a Hessian satisfying:

$$-\nabla^2 \ln p_\sigma(z) = \frac{1}{\sigma^2} \left[ I_d - \frac{1}{\sigma} \text{Var}(\varepsilon | X + \sigma\varepsilon = z) \right] \preceq \frac{1}{\sigma^2} I_d.$$

Consequently,  $F_\sigma$  is 1-strongly convex.

*Proof.* The convexity of  $x \mapsto -\ln p_\sigma(x)$  follows directly by the classical fact that a convolution of log-concave densities with a Gaussian is still log-concave (see [Saumard and Wellner, 2014, Proposition 3.5]). The fact that the Hessian is upper-bounded by  $\frac{1}{\sigma^2} I_d$  follows from a "second order Tweedie formula". The result is a direct consequence of an identity which can be seen as a "second order Tweedie formula" (e.g. Lemma A.1 in Gribonval [2011a] or in Lee and Vázquez [2003] equation 5.8.):

$$\begin{aligned} -\nabla^2 \ln p_\sigma(z) &= \frac{1}{\sigma^2} \left[ I_d - \frac{1}{\sigma} \text{Var}(\varepsilon | X + \sigma\varepsilon = z) \right] \\ &\preceq \frac{1}{\sigma^2} I_d, \end{aligned}$$

where  $\varepsilon$  denotes a standard  $d$ -dimensional Gaussian random variable ( $\varepsilon \sim \mathcal{N}(0, I_d)$ ) and the matrix inequality is due to the positiveness of the covariance matrix. For completeness we give the proof of the second order Tweedie identity. From the standard Tweedie identity (see, e.g. Efron [2011]) we have that:

$$\begin{aligned} -\nabla \ln p_\sigma(z) &= \frac{z - \mathbb{E}[X | X + \sigma\varepsilon = z]}{\sigma^2} \\ &= \frac{1}{\sigma^2} \int_{\mathbb{R}^d} (z - x) p(x|z) dx \\ &= \frac{1}{\sigma^2} \int_{\mathbb{R}^d} (z - x) \frac{\phi_\sigma(z - x) p(x)}{\int_{\mathbb{R}^d} \phi_\sigma(z - x') p(x') dx'} dx, \end{aligned}$$

where  $\phi_\sigma(z) = \exp(-\frac{z^2}{2\sigma^2})$ . Notice that  $\phi'_\sigma(z) = -\frac{z}{\sigma^2} \phi_\sigma(z)$ . We can now compute the Hessian of  $-\ln p_\sigma$ , letting  $X_\sigma = X + \sigma\varepsilon$ :

$$\begin{aligned} -\nabla^2 \ln p_\sigma(z) &= \frac{1}{\sigma^2} \left( I_d - \frac{1}{\sigma^2} \int_{\mathbb{R}^d} (z - x)^{\otimes 2} p(x|z) dx + \frac{1}{\sigma^2} \left[ \int_{\mathbb{R}^d} (z - x) p(x|z) dx \right]^{\otimes 2} \right) \\ &= \frac{1}{\sigma^2} \left( I_d - \frac{1}{\sigma^2} (\mathbb{E}[(X_\sigma - X)^{\otimes 2} | X_\sigma = z] - \mathbb{E}[X_\sigma - X | X_\sigma = z]^{\otimes 2}) \right) \\ &= \frac{1}{\sigma^2} \left( I_d - \frac{1}{\sigma^2} \text{Var}(\varepsilon | X_\sigma = z) \right), \end{aligned}$$

which concludes the proof.  $\square$

Now, we recall and prove Proposition 5, which is a direct consequence of proposition 4.

**Proposition 5.** For any  $\sigma > 0$ , the function  $F_\sigma$  is  $L_\sigma$ -smooth, with

$$L_\sigma = 1 + \frac{\tau}{\sigma^2}.$$

*Proof.* The proof directly follows from proposition 4 which implies that  $-\nabla \ln p_\sigma$  is  $1/\sigma^2$ -Lipschitz, so that  $F_\sigma$  is  $L_\sigma$ -smooth with  $L_\sigma = 1 + \frac{\tau}{\sigma^2}$ .  $\square$

## 829 A.2 Analysis of the MMSE Averaging iterates

830 We start by recalling our main result Theorem 1, which provides a convergence rate towards the  
831 proximal operator of the MMSE Averaging recursion.

832 **Theorem 1** (Convergence to the Proximal operator). *Let  $\text{prox}_{-\tau \ln p}(y)$  denote the unique solution of*  
833 *the Proximal Objective problem, then under Assumptions 1 and 2, we have that the MMSE Averaging*  
834 *recursion with  $\alpha_k = 1/(k+2)$ ,  $\sigma_k^2 = \tau/(k+1)$  and initialised at  $x_0 = y$  satisfy:*

$$\|x_k - \text{prox}_{-\tau \ln p}(y)\| \leq \frac{(\ln k) + 7}{k+1} [\|y - \text{prox}_{-\tau \ln p}(y)\| + \tau^2 M \sqrt{d}].$$

835 *Proof.* From Proposition 3, we are guaranteed that  $F_{\sigma_k}$  is strongly convex and smooth with

$$\mu_{\sigma_k} = 1, \quad L_{\sigma_k} = 1 + \frac{\tau}{\sigma_k^2} = k+2, \quad \kappa_{\sigma_k} = k+2.$$

836 To avoid heavy notations, we denote  $x_{\sigma_k}^* := \text{prox}_{-\tau \ln p_{\sigma_k}}(y) = \arg \min F_{\sigma_k}$  as well as  $x^* :=$   
837  $\text{prox}_{-\tau \ln p}(y) = \arg \min F$ , note that these quantities are well defined and unique by the strong  
838 convexity of  $F_{\sigma_k}$  and  $F$ .

839 Recall that through 1, one step of the eq. (MMSE Averaging) recursion can be seen as one step  
840 of gradient descent on  $F_{\sigma_k}$  with stepsize  $\gamma_k = \frac{1}{k+2}$  which corresponds to  $\gamma_k = 1/L_{\sigma_k}$ . Hence, at  
841 iteration  $k$ , standard convex optimisation results (see Theorem 2.1.15 in Nesterov [2013]) guarantee  
842 the improvement:

$$\begin{aligned} \|x_{k+1} - x_{\sigma_k}^*\| &\leq \left(1 - 2 \frac{\mu_{\sigma_k}}{\mu_{\sigma_k} + L_{\sigma_k}}\right)^{1/2} \|x_k - x_{\sigma_k}^*\| \\ &= \left(\frac{\kappa_{\sigma_k} - 1}{\kappa_{\sigma_k} + 1}\right)^{1/2} \|x_k - x_{\sigma_k}^*\| \\ &= \left(\frac{k+1}{k+3}\right)^{1/2} \|x_k - x_{\sigma_k}^*\| \end{aligned}$$

843 We now use the triangle inequality to write:

$$\|x_{k+1} - x_{\sigma_k}^*\| \leq \left(\frac{k+1}{k+3}\right)^{1/2} (\|x_k - x_{\sigma_{k-1}}^*\| + \|x_{\sigma_{k-1}}^* - x_{\sigma_k}^*\|). \quad (1)$$

844 And we clearly see that we need to be able to control the regularity of  $\sigma \mapsto x_{\sigma}^*$ . This is done in  
845 Proposition 9, where we show that  $x_{\sigma}^*$  is Lipschitz in  $\sigma^2$ :

$$\|x_{\sigma_1}^* - x_{\sigma_2}^*\|_2 \leq C(\sigma_1^2 - \sigma_2^2),$$

846 for  $\sigma_2 \leq \sigma_1 \leq \sqrt{\tau}$  and where  $C := \frac{1}{\tau} \|x^* - y\| + \tau M \sqrt{d}$ . Since  $\sigma_k \leq \sqrt{\tau}$ , we can use this bound  
847 and insert it in Equation (1) to get:

$$\|x_{k+1} - x_{\sigma_k}^*\| \leq \left(\frac{k+1}{k+3}\right)^{1/2} (\|x_k - x_{\sigma_{k-1}}^*\| + (\sigma_{k-1}^2 - \sigma_k^2)C),$$

848 It remains to unroll the inequality, using the fact that  $x_0 = y$  and that  $\Pi_{i=j}^k \left(\frac{i+1}{i+3}\right) = \frac{(j+1)(j+2)}{(k+2)(k+3)}$ :

$$\|x_{k+1} - x_{\sigma_k}^*\| \leq \frac{\sqrt{2}}{\sqrt{(k+2)(k+3)}} \|y - x_{\sigma_0}^*\| + \sum_{j=1}^k \sqrt{\frac{(j+1)(j+2)}{(k+2)(k+3)}} (\sigma_{j-1}^2 - \sigma_j^2)C.$$

849 Now since  $\sigma_k^2 = \frac{\tau}{k+1}$ , we have that  $(\sigma_{j-1}^2 - \sigma_j^2) = \frac{\tau}{j(j+1)}$ , hence for  $k \geq 1$ :

$$\begin{aligned} \|x_{k+1} - x_{\sigma_k}^*\| &\leq \frac{\sqrt{2}}{\sqrt{(k+2)(k+3)}} \|y - x_{\sigma_0}^*\| + \sum_{j=1}^k \sqrt{\frac{(j+1)(j+2)}{(k+2)(k+3)}} \frac{\tau C}{j(j+1)} \\ &\leq \frac{\sqrt{2}}{k+2} \|y - x_{\sigma_0}^*\| + \frac{\tau C}{k+2} \sum_{j=1}^k \frac{j+2}{j(j+1)} \end{aligned}$$

850 And we can simply bound:

$$\sum_{j=1}^k \frac{j+2}{j(j+1)} = \sum_{j=1}^k \left( \frac{1}{j} + \frac{1}{j} - \frac{1}{j+1} \right) \leq 1 + \sum_{j=1}^k \frac{1}{j} \leq 2 + \ln(k),$$

851 Therefore

$$\|x_{k+1} - x_{\sigma_k}^*\| \leq \frac{\sqrt{2}}{k+2} \|y - x_{\sigma_0}^*\| + \frac{(2 + \ln(k))\tau C}{k+2}.$$

852 Now using the triangular inequality  $\|x_{k+1} - x^*\| \leq \|x_{k+1} - x_{\sigma_k}^*\| + \|x_{\sigma_k}^* - x^*\|$  and using  
853 Proposition 9 which bounds  $\|x_{\sigma_k}^* - x^*\| \leq \sigma_k^2 C$  we get that:

$$\|x_{k+1} - x^*\| \leq \frac{\sqrt{2}}{k+2} \|y - x_{\sigma_0}^*\| + \frac{(2 + \ln(k))\tau C}{k+2} + \frac{\tau C}{k+1}.$$

854 And using the triangular inequality again:

$$\begin{aligned} \|y - x_{\sigma_0}^*\| &\leq \|y - x^*\| + \|x^* - x_{\sigma_0}^*\| \\ &\leq \|y - x^*\| + \sigma_0^2 C \\ &= \|y - x^*\| + \tau C, \end{aligned}$$

855 where the second inequality is due to Proposition 9. Therefore:

$$\begin{aligned} \|x_{k+1} - x^*\| &\leq \frac{\sqrt{2}\|y - x^*\|}{k+2} + \frac{(\ln k) + 2 + \sqrt{2}}{k+1} \tau C, \\ &\leq \frac{\sqrt{2}\|y - x^*\|}{k+1} + \frac{(\ln k) + 4}{k+1} \tau C. \end{aligned}$$

856 Plugging the definition of  $C = \frac{1}{\tau} \|x^* - y\| + \tau M \sqrt{d}$  we can finally write:

$$\|x_{k+1} - x^*\| \leq \frac{(\ln k) + 7}{k+1} \left( \|x^* - y\| + \tau^2 M \sqrt{d} \right),$$

857 which concludes the proof. □

858 This next proposition proves the tightness of theorem 1 (up to constants and the log-term) in the case  
859 of Gaussian prior. Here we assume that  $p$  is the density of a  $d$ -dimensional Gaussian  $\mathcal{N}(\mu, \Sigma)$ , with  
860  $\Sigma$  a positive definite matrix. Without loss of generality, we can assume that the Gaussian is centered:  
861 i.e.,  $\mu = 0$ .

862 **Proposition 6** (Exact convergence rate for Gaussian priors.). *Under the assumption that the prior  $p$*   
863 *is a  $d$ -dimensional centered Gaussian  $\mathcal{N}(0, \Sigma)$ , then the we have that the [MMSE Averaging](#) recursion*  
864 *with  $\alpha_k = 1/(k+2)$ ,  $\sigma_k^2 = \tau/(k+1)$  initialised at  $x_0 = y$  satisfies:*

$$x_k - \text{prox}_{-\tau \ln p}(y) = \frac{y - \text{prox}_{-\tau \ln p}(y)}{k+1}.$$

865 *Proof.* In this setting, the negative log-prior  $-\ln p$  is a quadratic with Hessian  $H = \Sigma^{-1}$ , and  $F$  is a  
866 quadratic:

$$F(x) = \frac{1}{2} \|y - x\|^2 + \frac{\tau}{2} x^\top \Sigma^{-1} x.$$

867 Its minimiser is given by:

$$x^* := \text{prox}_{-\tau \ln p}(y) = (I + \tau \Sigma^{-1})^{-1} y.$$

868 And since  $p_\sigma \sim \mathcal{N}(0, \Sigma + \sigma^2 I_d)$ , the smoothed objective writes:

$$F_{\sigma_k}(x) = \frac{1}{2} \|y - x\|^2 + \frac{\tau}{2} x^\top (\Sigma + \sigma_k^2 I_d)^{-1} x,$$

869 and its gradient is:

$$\nabla F_{\sigma_k}(x) = x - y + \tau(\Sigma + \sigma_k^2 I_d)^{-1} x.$$

870 We now prove the result by induction. For  $k = 0$ , we have  $x_0 = y$  and the base case trivially holds.

871 **Inductive step:** The inductive hypothesis provides that:

$$x_k = x^* + \frac{1}{k+1}(y - x^*).$$

872 Using the identity  $x^* = (I + \tau \Sigma^{-1})^{-1}y$ , we have:

$$y - x^* = \tau \Sigma^{-1} x^* \Rightarrow x_k = x^* + \frac{\tau}{k+1} \Sigma^{-1} x^*.$$

873 Then,

$$(\Sigma + \sigma_k^2 I_d)^{-1} x_k = (\Sigma + \frac{\tau}{k+1} I_d)^{-1} \left( I + \frac{\tau}{k+1} \Sigma^{-1} \right) x^* = \Sigma^{-1} x^* = \frac{y - x^*}{\tau},$$

874 so that:

$$\nabla F_{\sigma_k}(x_k) = x_k - y + (y - x^*) = x^* - y + \frac{1}{k+1}(y - x^*) + (y - x^*) = \frac{y - x^*}{k+1}$$

875 Now from Proposition 1, the update writes:

$$\begin{aligned} x_{k+1} &= x_k - \frac{1}{k+2} \nabla F_{\sigma_k}(x_k) \\ &= x^* + \frac{y - x^*}{k+1} - \frac{y - x^*}{(k+1)(k+2)} \\ &= x^* + \frac{(y - x^*)}{k+2}. \end{aligned}$$

876 This completes the inductive step, and hence the proof.  $\square$

### 877 A.3 Extension of distributions supported on affine subspaces of $\mathbb{R}^d$

878 In this subsection we prove that Theorem 1 can naturally be extended to the case where the prior  
879 distribution is on an affine subspace of dimension  $r \ll d$ , in which case the dimension  $d$  which  
880 appears in the upperbound reduces to the effective dimension  $r$ . Formally, we assume that the clean  
881 images  $x$  are drawn from a probability distribution  $\mu$  on  $\mathbb{R}^d$  satisfying the following:

882 **Assumption 4.** *There exists an affine subspace  $S \subset \mathbb{R}^d$  of dimension  $r$  such that:*

- 883 •  $\mu$  is supported on  $S$ :  $\mu(\mathbb{R}^d \setminus S) = 0$ . Moreover, the restriction of  $\mu$  to  $S$  admits a density  
884  $p : S \rightarrow \mathbb{R}_+$  with respect to the  $r$ -dimensional Lebesgue measure on  $S$ . By abuse of notation,  
885 we extend  $p$  to  $\mathbb{R}^d$  by setting  $p(x) = 0$  for  $x \in \mathbb{R}^d \setminus S$ .
- 886 •  $p(x) > 0$  for all  $x \in S$ .
- 887 •  $p$  is log-concave.

888 Let  $\phi_\sigma(x) = \exp\left(-\frac{\|x\|^2}{2\sigma^2}\right)$  denote the Gaussian kernel on  $\mathbb{R}^d$  of variance  $\sigma^2$ , now let  $C_\sigma :=$   
889  $(2\pi\sigma^2)^{1/2}$  such that  $\int_{\mathbb{R}^d} \phi_\sigma(x) dx = C_\sigma^d$ . The smoothed density function  $p_\sigma : \mathbb{R}^d \rightarrow \mathbb{R}_+$  then writes,  
890 for all  $z \in \mathbb{R}^d$ :

$$\begin{aligned} p_\sigma(z) &= \frac{1}{C_\sigma^d} \int_{\mathbb{R}^d} \phi_\sigma(z - x) d\mu(x) \\ &= \frac{1}{C_\sigma^d} \int_S p(x) \phi_\sigma(z - x) dx. \end{aligned}$$

891 For  $z \in \mathbb{R}^d$ , let  $z_\perp$  denote the orthogonal projection of  $z$  on  $S$ . Using orthogonality, notice that:

$$p_\sigma(z) = \frac{\phi_\sigma(z - z_\perp)}{C_\sigma^{d-r}} \cdot \frac{1}{C_\sigma^r} \int_S p(x) \phi_\sigma(z_\perp - x) dx.$$

892 Therefore, for  $z \in S$ , letting  $\tilde{p}_\sigma(z) := \frac{1}{C_\sigma^r} \int_S p(x) \phi_\sigma(z - x) dx$  denote the convolution of  $p$  with the  
893 Gaussian kernel over  $S$ , we get that

$$-\ln p_\sigma(z) = \frac{\|z - z_\perp\|_2^2}{2\sigma^2} - \ln \tilde{p}_\sigma(z_\perp) + (d - r) \ln C_\sigma.$$

894 And importantly:

$$-\nabla \Delta \ln p_\sigma(z) = -\nabla_S \Delta_S \ln \tilde{p}_\sigma(z_\perp),$$

895 where the  $\nabla_S$  and  $\Delta_S$  denote the intrinsic gradients and Laplacians on  $S$ .

896 Therefore from Lemma 5 we can upperbound:

$$\begin{aligned} \sup_{z \in \mathbb{R}^d} \|\nabla \Delta \ln p_\sigma(z)\| &= \sup_{z_\perp \in S} \|\nabla_S \Delta_S \ln \tilde{p}_\sigma(z_\perp)\| \\ &\leq \sqrt{r} \sup_{z_\perp \in S} \|\nabla_S^3 \ln p(z_\perp)\|, \end{aligned}$$

897 where the inequality is a direct consequence of Lemma 5 but applied to  $p$  considered over  $S$ . From  
898 here, all the proof of theorem 1 holds but with the effective dimension  $r$  appearing instead of  $d$ .

#### 899 A.4 Analysis of approximate PGD Algorithm 1

900 We now restate and prove convergence towards the MAP estimator of the approximate PGD algorithm.  
901 The following is a restatement of theorem 2 with the explicit constants.

902 **Theorem 3** (Convergence towards the MAP estimator with explicit bounds). *For  $\tau \leq \frac{1}{\lambda L_f}$  and a  
903 number of steps in the inner loop which increases as  $n_k = \lfloor c \cdot k^{1+\eta} \rfloor$  for  $c, \eta > 0$ , the approximate  
904 proximal gradient descent iterates  $(\hat{x}_k)_k$  from Algorithm 1 satisfy:*

$$\begin{aligned} \frac{1}{k} \sum_{i=1}^k J(x_i) - J^* &\leq \frac{1}{2\tau k} \left( \|y - x_{\text{MAP}}^*\|^2 + \sum_{i=1}^{\infty} \|\varepsilon_i\|^2 + 2R_{\eta,c} \sum_{i=1}^{\infty} \|\varepsilon_i\| \right) \\ \|\hat{x}_k - x_k\| &\leq \frac{(1+\eta) \ln(k) + \ln(c) + 7}{c \cdot k^{1+\eta}} \cdot R_{\eta,c}, \end{aligned}$$

905 where  $x_k := \text{prox}_{-\tau \ln p}(\hat{x}_{k-1} - \tau \lambda \nabla f(\hat{x}_{k-1}))$  corresponds to the true proximal mapping at each  
906 iteration, and where the quantities  $R_{\eta,c}$ ,  $\sum_{i=1}^{\infty} \|\varepsilon_i\|$  and  $\sum_{i=1}^{\infty} \|\varepsilon_i\|^2$  are given in lemma 1.

907 For, e.g.,  $\eta = 1$  and  $c = 10$ , the bounds become:

$$\begin{aligned} \frac{1}{k} \sum_{i=1}^k J(x_i) - J^* &\lesssim \frac{1}{\tau k} \left( 300 \cdot \|y - x_{\text{MAP}}^*\|^2 + 600 \cdot (\tau \lambda \|\nabla f(x_{\text{MAP}}^*)\| + \tau^2 M \sqrt{d}) \right) \\ \|\hat{x}_k - x_k\| &\lesssim \frac{2 \ln(k) + 10}{k^2} \cdot \left( 6 \cdot \|y - x_{\text{MAP}}^*\|^2 + 12 \cdot (\tau \lambda \|\nabla f(x_{\text{MAP}}^*)\| + \tau^2 M \sqrt{d}) \right). \end{aligned}$$

908 *Proof.* For  $\tau \leq \frac{1}{\lambda L_f}$ , the classic inequality after one step of the true proximal descent  $x_{k+1} :=$   
909  $\text{prox}_{-\tau \ln p}(\hat{x}_k - \tau \lambda \nabla f(\hat{x}_k))$  provides that (see, e.g. Beck and Teboulle [2009]):

$$J(x_{k+1}) - J^* \leq \frac{1}{2\tau} (\|\hat{x}_k - x_{\text{MAP}}^*\|^2 - \|x_{k+1} - x_{\text{MAP}}^*\|^2). \quad (2)$$

910 Now for  $k \geq 1$ , let  $\varepsilon_k := \hat{x}_k - x_k$  correspond to approximation error which can be quantified using  
911 Theorem 1. For  $k \geq 1$ , Equation (2) can be expanded as:

$$\begin{aligned} J(x_{k+1}) - J^* &\leq \frac{1}{2\tau} \left( \|x_k - x_{\text{MAP}}^*\|^2 - \|x_{k+1} - x_{\text{MAP}}^*\|^2 + \|\hat{x}_k - x_k\|^2 + 2\langle \hat{x}_k - x_k, x_k - x_{\text{MAP}}^* \rangle \right) \\ &\leq \frac{1}{2\tau} \left( \|x_k - x_{\text{MAP}}^*\|^2 - \|x_{k+1} - x_{\text{MAP}}^*\|^2 + \|\varepsilon_k\|^2 + 2\|\varepsilon_k\| \cdot \|x_k - x_{\text{MAP}}^*\| \right) \\ &\leq \frac{1}{2\tau} \left( \|x_k - x_{\text{MAP}}^*\|^2 - \|x_{k+1} - x_{\text{MAP}}^*\|^2 + \|\varepsilon_k\|^2 + 2R_{\eta,c} \|\varepsilon_k\| \right), \end{aligned}$$

912 where the second inequality is due to the Cauchy-Schwarz inequality, and the bound  $\|x_k - x_{\text{MAP}}^*\| \leq$   
913  $R_{\eta,c}$  is due to Lemma 1. It remains to sum this inequality from  $i = 1$  to  $k - 1$  and add inequality 2  
914 with  $k = 0$ , we get:

$$\begin{aligned} \sum_{i=1}^k (J(x_i) - J^*) &\leq \frac{1}{2\tau} \left( \|\hat{x}_0 - x_{\text{MAP}}^*\|^2 - \|x_k - x_{\text{MAP}}^*\|^2 + \sum_{i=1}^{k-1} \|\varepsilon_i\|^2 + 2R_{\eta,c} \sum_{i=1}^{k-1} \|\varepsilon_i\| \right) \\ &\leq \frac{1}{2\tau} \left( \|y - x_{\text{MAP}}^*\|^2 + \sum_{i=1}^{\infty} \|\varepsilon_i\|^2 + 2R_{\eta,c} \sum_{i=1}^{\infty} \|\varepsilon_i\| \right) \end{aligned}$$

915 where the second inequality is due to Lemma 1. Diving by  $k$  leads to the first result. The second  
 916 comes from the fact that  $\|\varepsilon_k\| = \|\hat{x}_k - x_k\|$  for which the upper bound is given in Lemma 1.  $\square$

917 Let  $\varepsilon_k := \hat{x}_k - x_k$  denote the approximation error at iteration  $k$ , where  $x_k := \text{prox}_{-\tau \ln p}(\hat{x}_{k-1} -$   
 918  $\tau \lambda \nabla f(\hat{x}_{k-1}))$  is the true proximal point. The following lemma provides a bound on this approxima-  
 919 tion error at each step, along with bounds on other useful quantities.

920 **Lemma 1.** *The approximate proximal gradient descent algorithm is initialised at  $\hat{x}_0 = y$ , with step*  
 921 *size  $\tau \leq \frac{1}{\lambda L_f}$ . If the number of inner iterations at step  $k$  is set to  $n_k = \lfloor c \cdot k^{1+\eta} \rfloor$  for all  $k \geq 1$ , then*  
 922 *the following holds:*

$$\begin{aligned} \|x_k - x_{\text{MAP}}^*\| &\leq R_{\eta,c}, \quad \|\varepsilon_k\| \leq \frac{(1+\eta) \ln(k) + \ln(c) + 7}{c \cdot k^{1+\eta}} \cdot R_{\eta,c}, \\ \sum_{k=1}^{\infty} \|\varepsilon_k\| &\leq S_{\eta,c} \cdot R_{\eta,c}, \quad \sum_{k=1}^{\infty} \|\varepsilon_k\|^2 \leq T_{\eta,c} \cdot R_{\eta,c}^2. \end{aligned}$$

923 where

$$\begin{aligned} R_{\eta,c} &:= B_{\eta,c} + \tau \lambda \|\nabla f(x_{\text{MAP}}^*)\| + \tau^2 M \sqrt{d} \\ B_{\eta,c} &:= \exp(2S_{\eta,c}) \left[ \|y - x_{\text{MAP}}^*\| + S_{\eta,c} \cdot (\tau \lambda \|\nabla f(x_{\text{MAP}}^*)\| + \tau^2 M \sqrt{d}) \right] \\ S_{\eta,c} &:= \frac{1+\eta}{c\eta^2} (1 + \eta \cdot (\ln(c) + 7)) \\ T_{\eta,c} &:= \frac{4(1+\eta)^2}{c^2(2\eta+1)^3} + \frac{2(\ln(c) + 7)^2}{c^2} \left( 1 + \frac{1}{2\eta+1} \right) \end{aligned}$$

924 For, e.g.,  $\eta = 1$ ,  $c = 10$ , these quantities simply become:

$$\begin{aligned} R_{\eta,c} &\approx B_{\eta,c} \approx 60 \cdot \|y - x_{\text{MAP}}^*\| + 120 \cdot (\tau \lambda \|\nabla f(x_{\text{MAP}}^*)\| + \tau^2 M \sqrt{d}) \\ S_{\eta,c} &\approx T_{\eta,c} \approx 2 \end{aligned}$$

925 *Proof.* Rewriting Equation (2), for  $k \geq 1$  we get that:

$$\begin{aligned} \|x_k - x_{\text{MAP}}^*\| &\leq \|\hat{x}_{k-1} - x_{\text{MAP}}^*\| \\ &\leq \|\hat{x}_{k-1} - x_{k-1}\| + \|x_{k-1} - x_{\text{MAP}}^*\| \\ &= \|\varepsilon_{k-1}\| + \|x_{k-1} - x_{\text{MAP}}^*\|. \end{aligned} \tag{3}$$

926 Furthermore, from Theorem 1, since  $c \cdot k^{1+\eta} - 1 \leq n_k \leq c \cdot k^{1+\eta}$ , we get for  $k \geq 1$ :

$$\begin{aligned} \|\varepsilon_k\| := \|\hat{x}_k - x_k\| &\leq \frac{(\ln n_k) + 7}{n_k + 1} [\|\hat{x}_{k-1} - \tau \lambda \nabla f(\hat{x}_{k-1}) - x_k\| + \tau^2 M \sqrt{d}] \\ &\leq \frac{(1+\eta) \ln(k) + \ln(c) + 7}{c \cdot k^{1+\eta}} [\|x_k - (I_d - \tau \lambda \nabla f)(\hat{x}_{k-1})\| + \tau^2 M \sqrt{d}]. \end{aligned} \tag{4}$$

927 Now, we use the triangle inequality to write:

$$\begin{aligned} \|x_k - (I_d - \tau \lambda \nabla f)(\hat{x}_{k-1})\| &\leq \|x_k - x_{\text{MAP}}^*\| + \|x_{\text{MAP}}^* - (I_d - \tau \lambda \nabla f)(x_{\text{MAP}}^*)\| \\ &\quad + \|(I_d - \tau \lambda f)(x_{\text{MAP}}^*) - (I_d - \tau \lambda f)(\hat{x}_{k-1})\| \end{aligned} \tag{5}$$

928 Now, since  $x_{\text{MAP}}^*$  satisfies the fixed point property  $x_{\text{MAP}}^* = \text{prox}_{-\tau \ln p}((I_d - \tau \lambda \nabla f)(x_{\text{MAP}}^*))$ , and  
 929 from the definition of  $x_k$ , we can write:

$$\begin{aligned} \|x_k - x_{\text{MAP}}^*\| &= \|\text{prox}_{-\tau \ln p}((I_d - \tau \lambda \nabla f)(\hat{x}_{k-1})) - \text{prox}_{-\tau \ln p}((I_d - \tau \lambda \nabla f)(x_{\text{MAP}}^*))\| \\ &\leq \|(I_d - \tau \lambda \nabla f)(\hat{x}_{k-1}) - (I_d - \tau \lambda \nabla f)(x_{\text{MAP}}^*)\|, \end{aligned}$$

930 where the inequality is due to the non-expansiveness of the proximal operator. Inequality 5 then  
 931 becomes

$$\begin{aligned} \|x_k - (I_d - \tau \lambda \nabla f)(\hat{x}_{k-1})\| &\leq 2\|(I_d - \tau \lambda f)(x_{\text{MAP}}^*) - (I_d - \tau \lambda f)(\hat{x}_{k-1})\| + \tau \lambda \|\nabla f(x_{\text{MAP}}^*)\| \\ &\leq 2\|x_{\text{MAP}}^* - \hat{x}_{k-1}\| + \tau \lambda \|\nabla f(x_{\text{MAP}}^*)\|. \end{aligned}$$

where the second inequality is because  $I_d - \tau\lambda f$  is Lipschitz for  $\tau \leq 1/(\lambda L_f)$ . Therefore, injecting this bound in inequality 4, we get for  $k \geq 1$ :

$$\begin{aligned} \|\varepsilon_k\| &\leq \frac{(1+\eta)\ln(k) + \ln(c) + 7}{c \cdot k^{1+\eta}} [2\|\hat{x}_{k-1} - x_{\text{MAP}}^*\| + \tau\lambda\|\nabla f(x_{\text{MAP}}^*)\| + \tau^2 M\sqrt{d}] \\ &\leq \frac{(1+\eta)\ln(k) + \ln(c) + 7}{c \cdot k^{1+\eta}} [2\|\varepsilon_{k-1}\| + 2\|x_{k-1} - x_{\text{MAP}}^*\| + \tau\lambda\|\nabla f(x_{\text{MAP}}^*)\| + \tau^2 M\sqrt{d}]. \end{aligned} \quad (6)$$

where the second inequality still holds for  $k = 1$  with the convention  $\varepsilon_0 = 0$  and  $x_0 = \hat{x}_0 = y$ . Now adding the inequality  $\|x_k - x_{\text{MAP}}^*\| \leq \|\varepsilon_{k-1}\| + \|x_{k-1} - x_{\text{MAP}}^*\|$  from 3 to inequality 6, and letting  $w_k := \|\varepsilon_k\| + \|x_k - x_{\text{MAP}}^*\|$  for  $k \geq 0$ , we get the following recursive inequality for  $k \geq 1$ :

$$w_k \leq (1 + 2C_k)w_{k-1} + C_k A,$$

where

$$C_k := \frac{(1+\eta)\ln(k) + \ln(c) + 7}{c \cdot k^{1+\eta}}, \quad A := \tau\lambda\|\nabla f(x_{\text{MAP}}^*)\| + \tau^2 M\sqrt{d}, \quad w_0 = \|y - x_{\text{MAP}}^*\|.$$

It now remains to unroll the recursive inequality on  $w_k$ , which is done in the auxiliary Lemma 2 to obtain:

$$w_k \leq \exp(2S_{\eta,c}) (w_0 + AS_{\eta,c}),$$

where

$$S_{\eta,c} := \frac{1+\eta}{c\eta^2} (1 + \eta \cdot (\ln(c) + 7)),$$

Putting things together we get the following uniform bound on  $w_k$ :

$$w_k \leq B_{\eta,c} := \exp(2S_{\eta,c}) [\|y - x_{\text{MAP}}^*\| + S_{\eta,c} \cdot (\tau\lambda\|\nabla f(x_{\text{MAP}}^*)\| + \tau^2 M\sqrt{d})]$$

From the definition of  $w_k = \|\varepsilon_k\| + \|x_k - x_{\text{MAP}}^*\|$ , we trivially get that  $\|x_k - x_{\text{MAP}}^*\| \leq B_{\eta,c}$ , and now from eq. (6) we get, for  $k \geq 1$ :

$$\|\varepsilon_k\| \leq \frac{(1+\eta)\ln(k) + \ln(c) + 7}{c \cdot k^{1+\eta}} [2B_{\eta,c} + \tau\lambda\|\nabla f(x_{\text{MAP}}^*)\| + \tau^2 M\sqrt{d}].$$

Letting  $R_{\eta,c} := 2B_{\eta,c} + \tau\lambda\|\nabla f(x_{\text{MAP}}^*)\| + \tau^2 M\sqrt{d} \geq B_{\eta,c}$  leads to the two first inequalities of the statement.

Now to bound  $\sum_{k=1}^{\infty} \|\varepsilon_k\|$  we simply reuse the bound obtained on  $\sum_j C_j \leq S_{\eta,c}$  in the proof of lemma 2 to obtain:

$$\sum_{k=1}^{\infty} \|\varepsilon_k\| \leq S_{\eta,c} \cdot R_{\eta,c}.$$

Finally for  $\sum_{k=1}^{\infty} \|\varepsilon_k\|^2$  we upperbound:

$$\sum_{k=1}^{\infty} \left( \frac{(1+\eta)\ln(k) + \ln(c) + 7}{c \cdot k^{1+\eta}} \right)^2 \leq \frac{2(1+\eta)^2}{c^2} \sum_{k=1}^{\infty} \frac{\ln^2(k)}{k^{2(1+\eta)}} + \frac{2(\ln(c) + 7)^2}{c^2} \sum_{k=1}^{\infty} \frac{1}{k^{2(1+\eta)}}.$$

We now bound the two series using integrals:

$$\begin{aligned} \sum_{k=1}^{\infty} \frac{\ln^2(k)}{k^{2(1+\eta)}} &\leq \int_1^{\infty} \frac{\ln^2(x)}{x^{2(1+\eta)}} dx = \frac{2}{(2\eta+1)^3}, \\ \sum_{k=1}^{\infty} \frac{1}{k^{2(1+\eta)}} &\leq 1 + \int_1^{\infty} \frac{1}{x^{2(1+\eta)}} dx = 1 + \frac{1}{2\eta+1}. \end{aligned}$$

Putting everything together, we obtain the bound:

$$\sum_{k=1}^{\infty} \|\varepsilon_k\|^2 \leq \left( \frac{4(1+\eta)^2}{c^2(2\eta+1)^3} + \frac{2(\ln(c) + 7)^2}{c^2} \left( 1 + \frac{1}{2\eta+1} \right) \right) R_{\eta,c}^2.$$

952

□

953 **Lemma 2.** *The recursive inequality*

$$w_k \leq (1 + 2C_k)w_{k-1} + C_k A, \quad \text{where} \quad C_k := \frac{(1 + \eta) \ln(k) + \ln(c) + 7}{c \cdot k^{1+\eta}}$$

954 *unrolls as:*

$$w_k \leq \exp(2S_{\eta,c}) (w_0 + AS_{\eta,c}),$$

955 *where*

$$S_{\eta,c} := \frac{1 + \eta}{c\eta^2} (1 + \eta \cdot (\ln(c) + 7)).$$

956 *Proof.* We iteratively apply the inequality to obtain:

$$w_k \leq w_0 \prod_{j=1}^k (1 + 2C_j) + A \sum_{i=1}^k C_i \prod_{j=i+1}^k (1 + 2C_j),$$

957 with the convention that empty products are equal to 1.

958 We now bound the product  $\prod_{j=1}^k (1 + 2C_j)$ . Using the inequality  $\log(1 + x) \leq x$ , we get:

$$\log \prod_{j=1}^k (1 + 2C_j) = \sum_{j=1}^k \log(1 + 2C_j) \leq \sum_{j=1}^k 2C_j,$$

959 hence,

$$\prod_{j=1}^k (1 + 2C_j) \leq \exp \left( 2 \sum_{j=1}^k C_j \right).$$

960 To bound the sum  $\sum_{j=1}^{\infty} C_j$ , we split the numerator:

$$\sum_{j=1}^{\infty} C_j = \frac{1 + \eta}{c} \sum_{j=1}^{\infty} \frac{\ln j}{j^{1+\eta}} + \frac{\ln(c) + 7}{c} \sum_{j=1}^{\infty} \frac{1}{j^{1+\eta}}.$$

961 We use the known bounds:

$$\sum_{j=1}^{\infty} \frac{1}{j^{1+\eta}} \leq 1 + \int_1^{\infty} \frac{1}{t^{1+\eta}} dt = 1 + \frac{1}{\eta}, \quad \sum_{j=2}^{\infty} \frac{\ln j}{j^{1+\eta}} \leq \int_1^{\infty} \frac{\ln t}{t^{1+\eta}} dt = \frac{1}{\eta^2},$$

962 which gives:

$$\begin{aligned} \sum_{j=1}^{\infty} C_j &\leq \frac{1 + \eta}{c\eta^2} + \frac{(\ln(c) + 7)}{c} \left( 1 + \frac{1}{\eta} \right) \\ &= \frac{1 + \eta}{c\eta^2} (1 + \eta \cdot (\ln(c) + 7)) =: S_{\eta,c}. \end{aligned}$$

963 Then we have:

$$\prod_{j=1}^k (1 + 2C_j) \leq \exp(2S_{\eta,c}), \quad \sum_{i=1}^k C_i \prod_{j=i+1}^k (1 + 2C_j) \leq S_{\eta,c} \exp(2S_{\eta,c}).$$

964 Plugging these into the expression for  $w_k$  yields the final bound:

$$w_k \leq \exp(2S_{\eta,c}) (w_0 + AS_{\eta,c}).$$

965

□

## 966 B Controlling $\sigma \mapsto x_\sigma^*$

967 The goal of this appendix is to show that the minimiser  $x_\sigma^*$  is Lipschitz-continuous with respect to  $\sigma^2$ .  
 968 To establish this, we need to control how the objective function  $F_\sigma$  evolves as  $\sigma$  changes. A natural  
 969 way to approach this is through a PDE perspective, since the smoothed density  $p_\sigma$  satisfies the heat  
 970 equation. This connection allows us to describe how  $p_\sigma$ , its logarithm, and its gradient (i.e., the score  
 971 function) evolve with respect to  $\sigma^2$ .

972 Throughout this appendix, we use the following notation for differential operators acting on functions  
 973  $f : \mathbb{R}^d \rightarrow \mathbb{R}$ :

- 974 •  $\nabla f$  denotes the gradient of  $f$ , a vector in  $\mathbb{R}^d$ ,
- 975 •  $\nabla^2 f$  denotes the Hessian of  $f$ , a  $d \times d$  matrix of second-order partial derivatives,
- 976 •  $\nabla^3 f$  denotes the third-order derivative tensor of  $f$ , a rank-3 tensor in  $\mathbb{R}^{d \times d \times d}$ ,
- 977 •  $\Delta f = \text{tr}(\nabla^2 f)$  denotes the Laplacian of  $f$ .

978 The first lemma provides several PDEs satisfied by  $p_\sigma$ ,  $\ln p_\sigma$ , and the score function  $\nabla \ln p_\sigma$ .

979 **Lemma 3.** *Let  $p(x)$  be a probability density and denote by  $p_\sigma(x)$  its convolution with an isotropic*  
 980 *centered Gaussian of variance  $\sigma^2$ . For  $\sigma > 0$ , it holds that  $p_\sigma(x) > 0$  for all  $x \in \mathbb{R}^d$  and  $p_\sigma$  follows*  
 981 *the heat equation:*

$$\frac{\partial p_\sigma}{\partial \sigma^2} = \frac{1}{2} \Delta p_\sigma.$$

982 Moreover,  $-\ln p_\sigma$  follows the following partial differential equation:

$$\frac{\partial \ln p_\sigma}{\partial \sigma^2} = \frac{1}{2} (\Delta \ln p_\sigma + \|\nabla \ln p_\sigma\|_2^2).$$

983 Taking the gradient in the previous equation we get that the score functions follow:

$$\frac{\partial \nabla \ln p_\sigma(x)}{\partial \sigma^2} = \frac{1}{2} [\nabla \Delta \ln p_\sigma(x) + 2[\nabla^2 \ln p_\sigma(x)] \nabla \ln p_\sigma(x)]$$

984 *Proof.* Standard results (see, e.g., [Evans, 2022, Chapter 2]) guarantee that  $(\sigma, x) \mapsto p_\sigma(x)$  is  $C^\infty$   
 985 on  $\mathbb{R}_+^* \times \mathbb{R}^d$  and satisfies the heat equation:

$$\frac{\partial p_\sigma}{\partial \sigma^2} = \frac{1}{2} \Delta p_\sigma.$$

986 By differentiating  $\ln p_\sigma$  w.r.t.  $\sigma^2$  and using the above, we directly have:

$$\frac{\partial \ln p_\sigma}{\partial \sigma^2} = \frac{1}{2} \frac{\Delta p_\sigma}{p_\sigma},$$

987 To get the PDE satisfied by  $\ln p_\sigma$  notice that:

$$\Delta \ln p_\sigma = \frac{\Delta p_\sigma}{p_\sigma} - \|\nabla \ln p_\sigma\|_2^2,$$

988 Using both equation above directly yields:

$$\frac{\partial \ln p_\sigma}{\partial \sigma^2} = \frac{1}{2} (\Delta \ln p_\sigma + \|\nabla \ln p_\sigma\|_2^2).$$

989 Taking the gradient leads to the result. □

990 This next lemma justifies the use of smoothed gradient descent by confirming that, as the smoothing  
 991 parameter  $\sigma \rightarrow 0$ , the minimisers of the smoothed objectives  $F_\sigma$  converge to the minimiser of the  
 992 original (non-smoothed) objective  $F$ . In other words, the limit of the smoothed minimisers coincides  
 993 with the proximal point we ultimately aim to recover.

994 **Lemma 4.** Recall that we define

$$F(x) := \frac{1}{2}\|y - x\|^2 - \tau \ln p(x) \quad \text{and} \quad F_\sigma(x) := \frac{1}{2}\|y - x\|^2 - \tau \ln p_\sigma(x).$$

995 Recall that  $\text{prox}_{-\tau \ln p}(y) := \arg \min_{x \in \mathbb{R}^d} F(x)$  and that  $\text{prox}_{-\tau \ln p_\sigma}(y) := \arg \min_{x \in \mathbb{R}^d} F_\sigma(x)$ . It holds  
996 that

$$\text{prox}_{-\tau \ln p_\sigma}(y) \xrightarrow{\sigma \rightarrow 0} \text{prox}_{-\tau \ln p}(y).$$

997 *Proof.* Let  $K$  be a compact set, since  $p$  is continuous and  $p(x) > 0$  on  $K$ , we have that there exists  
998  $a > 0$  such that  $\inf_{x \in K} p(x) \geq a$ . Since  $p$  is Lipschitz continuous on  $K$ , Theorem 2 in [Nesterov](#)  
999 [and Spokoiny \[2017\]](#) ensures that  $\sup_{x \in K} |p_\sigma(x) - p(x)| \xrightarrow{\sigma \rightarrow 0} 0$ . Therefore for  $\sigma$  small enough  
1000  $\inf_{x \in K} p_\sigma(x) \geq a/2$  and from standard inequalities on the logarithm:

$$|\ln(p_\sigma(x)) - \ln(p(x))| \leq \frac{|p_\sigma(x) - p(x)|}{\min(p_\sigma(x), p(x))} \leq \frac{2}{a}|p_\sigma(x) - p(x)|.$$

Therefore  $\sup_{x \in K} |\ln(p_\sigma(x)) - \ln(p(x))| \xrightarrow{\sigma \rightarrow 0} 0$  on all compact set  $K$ , and trivially:

$$\sup_{x \in K} |F_\sigma(x) - F(x)| \xrightarrow{\sigma \rightarrow 0} 0.$$

1001 To ease notations, let  $x_\sigma^*$  be the minimiser of  $F_\sigma$  and  $x^*$  that of  $F$ . Note that such minimisers exist  
1002 and are unique since  $F_\sigma$  and  $F$  are strongly convex by proposition 4. Consider the values  $F_\sigma(x^*)$ . By  
1003 optimality of  $x_\sigma^*$  we know that  $F_\sigma(x_\sigma^*) \leq F_\sigma(x^*)$ . Moreover, since  $F_\sigma \rightarrow F$  uniformly on compact  
1004 sets, we have  $F_\sigma(x^*) \rightarrow F(x^*)$ , so in particular, the sequence  $(F_\sigma(x_\sigma^*))$  is uniformly bounded above:

$$F_\sigma(x_\sigma^*) \leq F_\sigma(x^*) \leq F(x^*) + \varepsilon,$$

1005 for some positive finite  $\varepsilon$ . Now, assume that  $\|x_\sigma^*\| \rightarrow \infty$  along some sequence. Since the functions  
1006  $F_\sigma$  are all 1-strongly convex, they can all be lower bounded by the same quadratic and we would  
1007 have  $F_\sigma(x_\sigma^*) \rightarrow \infty$ , contradicting the bound above. Therefore, the sequence  $(x_\sigma^*)$  is bounded, and  
1008 thus contained in a fixed compact set  $K \subset \mathbb{R}^d$ .

1009 Since  $F_\sigma \rightarrow F$  uniformly on  $K$ , any cluster point  $x_\infty$  of  $(x_\sigma^*)$  satisfies

$$F(x_\infty) = \lim_{\sigma \rightarrow 0} F_\sigma(x_\sigma^*) \leq \lim_{\sigma \rightarrow 0} F_\sigma(x^*) = F(x^*).$$

1010 Therefore, by uniqueness of the minimizer of  $F$ , it must be that  $x_\infty = x^*$  so that  $x_\sigma^* \xrightarrow{\sigma \rightarrow 0} x^*$ .  $\square$

1011 The next proposition establishes the existence and smoothness of the solution path  $x_\sigma^*$  as a function  
1012 of  $\sigma$ .

1013 **Proposition 7** (Existence of the smooth solution path). *Define*

$$F_\sigma(x) := \frac{1}{2}\|y - x\|^2 - \tau \ln p_\sigma(x).$$

1014 Denote by  $x_\sigma^*$  the minimizer of  $F_\sigma$  for any  $\sigma > 0$ . Then, under  $\sigma^2 \mapsto x_\sigma$  is continuously differentiable  
1015 on  $(0, \tau]$  and satisfies the following ordinary differential equation:

$$\frac{dx_\sigma^*}{d\sigma^2} =: \dot{x}_\sigma^* = -\nabla^2 F_\sigma(x_\sigma^*)^{-1} \partial_{\sigma^2} \nabla F_\sigma(x_\sigma^*).$$

1016 *Proof.* By smoothness of the solution of the heat equation (see, e.g., [\[Evans, 2022, Chapter 2\]](#)), we  
1017 have that  $x \mapsto F_\sigma(x)$  is differentiable for any  $\sigma > 0$  and  $(\sigma^2, x) \mapsto \nabla_x F_\sigma(x)$  is jointly differentiable  
1018 on  $\mathbb{R}_+^* \times \mathbb{R}^d$ . Then, by proposition 4, we have that the Hessian  $\nabla^2 F_\sigma(x)$  is invertible and satisfies:  
1019  $\nabla^2 F_\sigma(x) \geq I$ . We can then apply the implicit function theorem, which guarantees the existence of  
1020 a unique solution path  $\sigma^2 \mapsto x_\sigma^*$  to the implicit equation:  $\nabla F_\sigma(x_\sigma^*) = 0$  that is differentiable on  
1021  $(0, \tau]$ . By strong convexity of  $F_\sigma$ , such solution path coincides with the minimizers of  $F_\sigma$  for all  
1022  $\sigma > 0$ . The ODE followed by  $\sigma^2 \mapsto x_\sigma^*$  is obtained by taking the derivative w.r.t  $\sigma^2$  of the equality  
1023  $\nabla F_\sigma(x_\sigma^*) = 0$ .  $\square$

1024 **Proposition 8** (Bound on the solutions). *Let  $x_\sigma^\star := \arg \min_{x \in \mathbb{R}^D} F_\sigma(x)$ , then for  $\sigma^2 \leq \tau$  it holds*  
 1025 *that*

$$\|x_\sigma^\star - y\| \leq \|y - \text{prox}_{-\tau \ln p}(y)\| + \frac{1}{2}\tau^2 M\sqrt{d}$$

1026 *Proof.* Let use write  $\dot{x}_\sigma^\star = \frac{dx_\sigma^\star}{d\sigma^2}$  (note that the derivative is with respect to  $\sigma^2$  and not  $\sigma$ ). From  
 1027 proposition 7, we have that  $x_\sigma^\star$  follows the differential equation:

$$\begin{aligned} \dot{x}_\sigma^\star &= -\nabla^2 F_\sigma(x_\sigma^\star)^{-1} \partial_{\sigma^2} \nabla F_\sigma(x_\sigma^\star) \\ &= \tau \nabla^2 F_\sigma(x_\sigma^\star)^{-1} \partial_{\sigma^2} \nabla \ln p_\sigma(x_\sigma^\star) \\ &= \frac{1}{2} [-\nabla^2 \ln p_\sigma(x_\sigma^\star) + \frac{1}{\tau} I_d]^{-1} [\nabla \Delta \ln p_\sigma(x_\sigma^\star) + 2[\nabla^2 \ln p_\sigma(x_\sigma^\star)] \nabla \ln p_\sigma(x_\sigma^\star)] \end{aligned} \quad (7)$$

1028 where the last equality follows from lemma 3. Furthermore, recalling the optimality condition  
 1029 satisfied by  $x_\sigma^\star$ , i.e.:  $\nabla \ln p_\sigma(x_\sigma^\star) = \frac{1}{\tau}(x_\sigma^\star - y)$ , it follows that:

$$\dot{x}_\sigma^\star = -\frac{1}{2\tau} Q_\sigma (x_\sigma^\star - y) + B_\sigma, \quad (8)$$

1030 where the matrix  $Q_\sigma$  and vector  $B_\sigma$  are given by:

$$Q_\sigma := -[-\nabla^2 \ln p_\sigma(x_\sigma^\star) + \frac{1}{\tau} I_d]^{-1} \nabla^2 \ln p_\sigma(x_\sigma^\star) \succeq 0 \quad (9)$$

$$B_\sigma := \frac{1}{2} [-\nabla^2 \ln p_\sigma(x_\sigma^\star) + \frac{1}{\tau} I_d]^{-1} \Delta \nabla \ln p_\sigma(x_\sigma^\star). \quad (10)$$

1031 Here, the matrix  $Q_\sigma$  is positive semi-definite since  $-\nabla^2 \ln p_\sigma(x)$  is positive by proposition 4. We  
 1032 can multiply the ODE eq. (8) by  $x_\sigma^\star - y$  from both sides to get:

$$\begin{aligned} \frac{1}{2} \frac{d\|x_\sigma^\star - y\|^2}{d\sigma^2} &= \langle \dot{x}_\sigma^\star, x_\sigma^\star - y \rangle \\ &= -\frac{1}{2\tau} \|x_\sigma^\star - y\|_{Q_\sigma}^2 + \langle B_\sigma, x_\sigma^\star - y \rangle \\ &\leq \langle B_\sigma, x_\sigma^\star - y \rangle \\ &\leq \|B_\sigma\| \|x_\sigma^\star - y\|. \end{aligned}$$

1033 By the apriori estimate on  $\nabla \Delta \log p_\sigma(x_\sigma^\star)$  from Lemma 5, we directly have that  $\|B_\sigma\| \leq \frac{\tau}{2} M\sqrt{d}$ .  
 1034 Injecting such bound in the above inequality and dividing both sides by  $\|x_\sigma^\star - y\|$  yields:

$$\frac{d\|x_\sigma^\star - y\|}{d\sigma^2} \leq \frac{\tau}{2} M\sqrt{d}.$$

1035 And after integration of the above inequality w.r.t.  $\sigma^2$  on  $(0, \sigma^2]$  and using that  $\lim_{\sigma \rightarrow 0} x_\sigma^\star =$   
 1036  $\text{prox}_{-\tau \ln p}(y)$  from Proposition 7, we get:

$$\begin{aligned} \|x_\sigma^\star - y\| &\leq \|y - \text{prox}_{-\tau \ln p}(y)\| + \frac{1}{2}\sigma^2 \tau M\sqrt{d} \\ &\leq \|y - \text{prox}_{-\tau \ln p}(y)\| + \frac{1}{2}\tau^2 M\sqrt{d}, \end{aligned}$$

1037 where the last inequality is since we consider  $\sigma^2 \leq \tau$ . □

1038 **Proposition 9** (Lipschitz continuity of  $\sigma^2 \mapsto x_\sigma^\star$ ). *Let  $x_\sigma^\star := \arg \min_{x \in \mathbb{R}^d} F_\sigma(x)$ , then for  $\sigma_2^2 \leq$*   
 1039  *$\sigma_1^2 \leq \tau$ , it holds that:*

$$\|x_{\sigma_1}^\star - x_{\sigma_2}^\star\|_2 \leq (\sigma_1^2 - \sigma_2^2) \left[ \frac{1}{\tau} \|y - \text{prox}_{-\tau \ln p}(y)\| + \tau M\sqrt{d} \right],$$

1040 *And taking  $\sigma_2 \rightarrow 0$  in the above inequality:*

$$\|x_\sigma^\star - \text{prox}_{-\tau \ln p}(y)\|_2 \leq \sigma^2 \left[ \frac{1}{\tau} \|y - \text{prox}_{-\tau \ln p}(y)\| + \tau M\sqrt{d} \right],$$

1041 *Proof.* Recall from eq. (7):

$$\dot{x}_\sigma^* = \frac{1}{2}[-\nabla^2 \ln p_\sigma(x_\sigma^*) + \frac{1}{\tau} I_d]^{-1}[\nabla \Delta \ln p_\sigma(x_\sigma^*) + 2[\nabla^2 \ln p_\sigma(x_\sigma^*)]\nabla \ln p_\sigma(x_\sigma^*)]$$

1042 Now, by proposition 4, we have that  $-\nabla^2 \ln p_\sigma(x) \succeq 0$ , and a spectral norm bound on the inverse  
1043 yields:

$$\|[-\nabla^2 \ln p_\sigma(x_\sigma^*) + \frac{1}{\tau} I_d]^{-1} \nabla \Delta \ln p_\sigma(x_\sigma^*)\| \leq \tau \|\nabla \Delta \ln p_\sigma(x_\sigma^*)\|$$

1044 and:

$$\|[-\nabla^2 \ln p_\sigma(x_\sigma^*) + \frac{1}{\tau} I_d]^{-1} [\nabla^2 \ln p_\sigma(x_\sigma^*)] \nabla \ln p_\sigma(x_\sigma^*)\| \leq \|\nabla \ln p_\sigma(x_\sigma^*)\|.$$

1045 Putting things together we obtain that:

$$\|\dot{x}_\sigma^*\| \leq \|\nabla \ln p_\sigma(x_\sigma^*)\| + \frac{\tau}{2} \|\nabla \Delta \ln p_\sigma(x_\sigma^*)\| \quad (11)$$

$$\leq \|\nabla \ln p_\sigma(x_\sigma^*)\| + \frac{\tau}{2} M \sqrt{d}, \quad (12)$$

1046 where the second inequality is due to Lemma 5. Now recall that the optimality conditions which  
1047 define  $x_\sigma^*$  are  $\nabla \ln p_\sigma(x_\sigma^*) = \frac{1}{\tau}(x_\sigma^* - y)$ . Plugging this equality in the upperbound we get that:

$$\begin{aligned} \|\dot{x}_\sigma^*\| &\leq \frac{1}{\tau} \|y - x_\sigma^*\| + \frac{\tau}{2} M \sqrt{d} \\ &\leq \frac{1}{\tau} \|y - \text{prox}_{-\tau \ln p}(y)\| + \tau M \sqrt{d}, \end{aligned}$$

1048 where the last inequality is due to Proposition 8.

1049 From here it suffices to notice that, for  $\sigma_1 \geq \sigma_2 > 0$ :

$$\begin{aligned} \|x_{\sigma_1}^* - x_{\sigma_2}^*\| &= \left\| \int_{\sigma_1^2}^{\sigma_2^2} \dot{x}_\sigma^* d\sigma^2 \right\| \\ &\leq \int_{\sigma_1^2}^{\sigma_2^2} \|\dot{x}_\sigma^*\| d\sigma^2 \\ &\leq (\sigma_1^2 - \sigma_2^2) \left[ \frac{1}{\tau} \|y - \text{prox}_{-\tau \ln p}(y)\| + \tau M \sqrt{d} \right], \end{aligned}$$

1050 to prove the first statement. The second follows from the fact that  $x_{\sigma_2}^* \xrightarrow{\sigma_2 \rightarrow 0} \text{prox}_{-\tau \ln p}(y)$  by  
1051 proposition 7.  $\square$

1052 This last result is the most technical lemma in this work. It establishes that the third derivative of the  
1053 smoothed log-density  $\ln p_\sigma$  can be uniformly controlled—independently of  $\sigma$ . This regularity bound  
1054 is essential for tracking how the minimisers  $x_\sigma^*$  evolve as  $\sigma$  varies.

1055 **Lemma 5.** For all  $\sigma \geq 0$ , it holds that  $\sup_{x \in \mathbb{R}^d} \|\nabla \Delta \ln p_\sigma(x)\| \leq \sqrt{d}M$ .

1056 *Proof. Idea of proof:* Letting  $V(\sigma, x) := -\ln p_\sigma(x)$  we will show that  $\|\nabla^3 V(\sigma, x)\|$  must be  
1057 maximal for  $\sigma = 0$ . To do so we will use the maximum principle on  $\|\nabla^3 V(\sigma, x)\|^2$ .

1058 From Lemma 3, we have that  $V$  follows the following PDE:

$$\partial_{\sigma^2} V = \frac{1}{2}(\Delta V - \|\nabla V\|^2).$$

1059 For  $i, j, k \in [d]$ , we let  $w_{ijk} := \partial_{ijk} V$ , which therefore follows:

$$\partial_{\sigma^2} w_{ijk} = \frac{1}{2}(\Delta w_{ijk} - \partial_{ijk} \|\nabla V\|^2).$$

1060 Now let  $u_{ijk} = w_{ijk}^2$ , multiplying the previous equation by  $w_{ijk}$  we get:

$$\begin{aligned}\partial_{\sigma^2} u_{ijk} &= w_{ijk} \Delta w_{ijk} - w_{ijk} \partial_{ijk} \|\nabla V\|^2 \\ &= \frac{1}{2} (\Delta u_{ijk} - (\Delta w_{ijk})^2) - w_{ijk} \partial_{ijk} \|\nabla V\|^2 \\ &\leq \frac{1}{2} \Delta u_{ijk} - w_{ijk} \partial_{ijk} \|\nabla V\|^2\end{aligned}$$

1061 Summing over  $i, j, k$  and letting  $S := \|\nabla^3 V\|_2^2 = \sum_{ijk} u_{ijk}$  we have that:

$$\partial_{\sigma^2} S \leq \frac{1}{2} \Delta S - \sum_{ijk} w_{ijk} \partial_{ijk} \|\nabla V\|^2$$

1062 It remains to know the behaviour of this last term in the inequality. Since  $\|\nabla V\|^2 = \sum_{\ell} (\partial_{\ell} V)^2$ ,  
1063 taking the third derivative with respect to  $i, j, k$  we get that:

$$\begin{aligned}\partial_{ijk} \|\nabla V\|^2 &= 2 \sum_{\ell} \partial_{\ell} V \cdot \partial_{ijk\ell} V + \partial_{jkl} V \cdot \partial_{il} V + \partial_{ikl} V \cdot \partial_{jl} V + \partial_{ijl} V \cdot \partial_{kl} V \\ &= 2 \langle \nabla V, \nabla w_{ijk} \rangle + 2 \sum_{\ell} w_{jkl} \cdot \partial_{il} V + w_{ikl} \cdot \partial_{jl} V + w_{ijl} \cdot \partial_{kl} V.\end{aligned}$$

1064 Multiplying the equality by  $w_{ijk}$  and summing over  $i, j, k$  we get:

$$\sum_{ijk} w_{ijk} \partial_{ijk} \|\nabla V\|^2 = \langle \nabla V, \nabla S \rangle + 2 \sum_{ijk\ell} w_{ijk} w_{jkl} \cdot \partial_{il} V + w_{ijk} w_{ikl} \cdot \partial_{jl} V + w_{ijk} w_{ijl} \cdot \partial_{kl} V.$$

1065 However notice that from the convexity of  $V(\sigma, \cdot)$  for all  $\sigma \geq 0$ , we get that:

$$\sum_{jk} \underbrace{\left( \sum_{i\ell} w_{ijk} w_{jkl} \cdot \partial_{il} V \right)}_{\geq 0} \geq 0$$

1066 Which implies that the function  $S = \|\nabla^3 V\|^2$  satisfies the parabolic inequality

$$\partial_{\sigma^2} S \leq \frac{1}{2} \Delta S - \langle \nabla V, \nabla S \rangle.$$

1067 Since  $S$  cannot be constant, the strong maximum principle<sup>1</sup> implies that  $S$  must attain its maximum  
1068 for  $\sigma = 0$ :

$$\sup_{\sigma \geq 0, x \in \mathbb{R}^d} \|\nabla^3 \ln p_{\sigma}(x)\| = \sup_{x \in \mathbb{R}^d} \|\nabla^3 \ln p(x)\|.$$

1069 Finally, from the Cauchy-Schwarz inequality, one gets:

$$\|\nabla \Delta f\|^2 = \sum_{i=1}^d \left( \sum_{j=1}^d \partial_{ijj} f \right)^2 \leq d \sum_{i,j=1}^d (\partial_{ijj} f)^2 \leq d \sum_{i,j,k=1}^d (\partial_{ijk} f)^2 = d \|\nabla^3 f\|_2^2,$$

1070 which concludes the proof.

1071

□

---

<sup>1</sup>For an accessible explanation of the strong maximum principle, we refer the reader to the corresponding Wikipedia article [https://en.wikipedia.org/wiki/Maximum\\_principle](https://en.wikipedia.org/wiki/Maximum_principle).
